# Supplementary material for: The MORPHEUS II protein crystallization screen
Source: PubMed Central journal article supplement (PMC4498703; doi:10.1107/s2053230x1500967x), 2015-06-27
Supplement: f-71-00831-sup1.pdf [file f-71-00831-sup1.pdf]

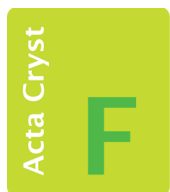

STRUCTURAL BIOLOGY  
COMMUNICATIONS

**Volume 71 (2015)**

**Supporting information for article:**

**The MORPHEUS II protein crystallization screen**

**Fabrice Gorrec**

**Table S1** MORPHEUS II precipitant mixes.

| Wells           | Prec.      | Conc | Unit  | Cryo                             | Conc. | Unit  | Surfactant | Conc. | Unit  |
|-----------------|------------|------|-------|----------------------------------|-------|-------|------------|-------|-------|
| Col 1, 5 and 9  | PEG 3K     | 30   | % w/v | 1,2,4-Butanetriol                | 40    | % v/v | NDSB 256   | 2     | % w/v |
| Col 2, 6 and 10 | PEG 4K     | 25   | % w/v | 1,2,6-Hexanetriol                | 40    | % v/v |            |       |       |
| Col 3, 7 and 11 | PEG 8K     | 20   | % w/v | 1,5-Pentanediol                  | 40    | % v/v |            |       |       |
| Col 4, 8 and 12 | PEG<br>20K | 10   | % w/v | 1,1,1-Tris(hydroxymethyl)propane | 50    | % w/v | NDSB 195   | 2     | % w/v |

**Table S2** MORPHEUS II buffer systems.

| Wells    | Acid name | Conc | Unit | pH   | Base name           | Conc | Unit | pH   | ratio (approx.) | final pH |
|----------|-----------|------|------|------|---------------------|------|------|------|-----------------|----------|
| Col 1-4  | MOPSO     | 1    | M    | 3.3  | Bis-tris            | 1    | M    | 12.0 | 60/40           | 6.5      |
| Col 5-8  | BES       | 1    | M    | 4.16 | Triethylamine (TEA) | 1    | M    | 11.2 | 50/50           | 7.5      |
| Col 9-12 | GlyGly    | 1    | M    | 5.8  | AMPD                | 1    | M    | 11.8 | 66/33           | 8.5      |

**Table S3** Crystallisation results

A condition was considered as succesful when at least one of the triplicate exhibited crystals (results were all repeated at least twice apart from rare exceptions). The yield is calculated as follow:  $\text{Total} \div (96 \times 8) \times 100$ .

| JCSG+ |      |      |     |     |     |     |     |     | MORPHEUS I |      |      |     |     |     |     |     |     | MORPHEUS II |      |      |     |     |     |     |     |     |
|-------|------|------|-----|-----|-----|-----|-----|-----|------------|------|------|-----|-----|-----|-----|-----|-----|-------------|------|------|-----|-----|-----|-----|-----|-----|
| Well  | Con. | Pol. | E2H | Bar | CCD | UPL | NEF | HIV | Well       | Con. | Pol. | E2H | Bar | CCD | UPL | NEF | HIV | Well        | Con. | Pol. | E2H | Bar | CCD | UPL | NEF | HIV |
| A1    |      |      |     |     |     |     |     |     | A1         | x    | x    |     |     |     |     |     |     | A1          |      |      |     |     | x   |     |     | x   |
| A2    | x    |      |     | x   |     |     |     |     | A2         |      |      |     |     |     |     |     | x   |             | A2   | x    |     |     |     | x   |     | x   |
| A3    | x    |      |     |     |     | x   |     |     | A3         |      |      |     |     |     |     |     |     |             | A3   | x    |     |     |     | x   |     | x   |
| A4    |      |      |     |     |     |     |     |     | A4         |      | x    |     |     |     |     |     |     |             | A4   |      |     |     |     | x   |     |     |
| A5    |      |      |     |     |     |     |     |     | A5         |      | x    |     |     |     |     |     |     |             | A5   | x    |     |     |     |     |     | x   |
| A6    |      | x    |     |     |     |     |     | x   | A6         |      |      |     | x   | x   |     |     |     |             | A6   | x    |     |     |     |     | x   | x   |
| A7    | x    |      |     |     |     |     |     |     | A7         |      |      |     |     |     |     |     |     |             | A7   | x    |     |     |     |     |     | x   |
| A8    | x    |      |     |     |     | x   |     | x   | A8         |      | x    |     |     |     |     |     |     |             | A8   |      |     |     |     |     |     |     |
| A9    | x    |      |     | x   |     |     |     | x   | A9         |      | x    |     |     |     |     |     |     |             | A9   |      |     |     |     |     | x   |     |
| A10   | x    |      |     |     |     | x   |     |     | A10        |      |      |     |     |     | x   |     |     |             | A10  | x    |     |     |     |     |     | x   |
| A11   |      |      |     |     |     |     |     |     | A11        |      |      |     |     |     | x   |     | x   |             | A11  | x    |     | x   |     |     |     | x   |
| A12   | x    |      |     | x   | x   | x   |     | x   | A12        |      | x    |     |     |     |     |     |     |             | A12  |      |     | x   |     |     |     |     |
| B1    |      |      |     |     |     |     |     |     | B1         | x    | x    |     |     |     |     |     |     |             | B1   | x    |     |     |     |     |     |     |
| B2    |      |      |     | x   | x   | x   |     |     | B2         | x    |      |     |     |     |     |     |     | x           | B2   | x    |     |     | x   |     |     |     |
| B3    |      |      |     |     |     |     |     |     | B3         |      |      |     |     |     |     |     |     |             | B3   | x    |     |     | x   |     |     |     |
| B4    |      |      |     |     |     | x   |     | x   | B4         |      | x    |     |     |     |     |     |     |             | B4   |      |     |     |     |     |     |     |
| B5    |      |      |     |     |     | x   |     |     | B5         |      | x    |     |     | x   |     |     |     |             | B5   | x    |     |     |     |     |     |     |
| B6    |      |      |     |     |     |     |     |     | B6         |      |      |     |     |     |     |     |     |             | B6   | x    |     |     |     |     |     |     |
| B7    |      | x    |     |     |     |     |     | x   | B7         |      |      |     |     | x   | x   |     |     |             | B7   | x    |     |     | x   |     |     |     |
| B8    | x    |      | x   |     |     |     |     |     | B8         |      | x    |     |     | x   |     |     |     |             | B8   |      |     |     |     |     |     |     |
| B9    | x    | x    |     |     |     |     | x   |     | B9         |      | x    |     |     |     |     |     |     | x           | B9   | x    |     |     |     | x   |     | x   |
| B10   |      |      |     |     |     |     |     |     | B10        |      |      |     |     |     |     |     |     |             | B10  |      |     |     |     |     |     | x   |
| B11   |      |      |     |     |     |     |     |     | B11        |      |      |     |     |     | x   |     |     |             | B11  |      |     |     |     |     |     |     |
| B12   |      |      |     | x   |     |     |     |     | B12        |      | x    |     |     | x   |     |     |     |             | B12  |      |     |     |     |     |     |     |
| C1    |      | x    |     |     |     |     |     |     | C1         | x    | x    |     |     |     |     |     |     | x           | C1   | x    |     |     |     |     |     |     |
| C2    |      |      |     |     |     |     |     |     | C2         |      |      |     |     |     | x   |     |     |             | C2   | x    |     |     |     |     |     | x   |
| C3    | x    |      |     | x   |     |     |     | x   | C3         |      |      |     |     |     |     |     |     | x           | C3   | x    |     |     | x   |     |     | x   |
| C4    | x    |      |     |     |     |     |     | x   | C4         |      | x    |     | x   | x   |     |     |     |             | C4   |      |     |     | x   |     |     |     |
| C5    |      |      |     |     |     |     |     |     | C5         |      | x    |     |     |     |     |     |     |             | C5   | x    |     |     |     |     |     | x   |
| C6    |      |      |     |     |     |     |     |     | C6         |      |      |     |     |     |     |     |     |             | C6   |      |     |     |     |     |     | x   |
| C7    |      |      |     |     |     |     |     |     | C7         |      |      |     |     |     |     |     |     |             | C7   |      |     |     |     |     | x   | x   |
| C8    |      |      |     |     |     |     |     |     | C8         |      | x    |     | x   | x   |     |     |     |             | C8   |      |     |     |     |     |     |     |
| C9    |      |      |     |     | x   |     |     |     | C9         |      |      |     |     |     |     |     |     |             | C9   | x    |     |     | x   | x   |     | x   |
| C10   |      |      |     |     |     |     |     |     | C10        |      |      |     |     |     |     |     |     |             | C10  |      |     |     |     |     |     | x   |
| C11   |      |      |     |     |     |     |     |     | C11        |      |      |     |     |     |     |     |     |             | C11  |      |     |     |     |     |     | x   |
| C12   |      | x    |     |     |     |     |     | x   | C12        |      | x    |     |     |     |     |     |     |             | C12  |      |     |     |     |     |     |     |
| D1    |      |      |     |     |     |     |     |     | D1         | x    | x    |     |     |     |     |     |     |             | D1   | x    |     |     |     |     |     |     |
| D2    |      |      |     |     |     |     |     | x   | D2         | x    |      |     |     |     |     |     |     |             | D2   | x    |     |     | x   |     |     |     |
| D3    |      |      |     |     |     |     |     |     | D3         | x    |      |     |     |     |     |     |     |             | D3   | x    |     |     | x   |     |     |     |
| D4    |      |      |     |     |     |     |     |     | D4         | x    | x    |     |     |     |     |     |     |             | D4   |      |     |     | x   |     |     |     |
| D5    |      |      |     |     |     |     |     |     | D5         |      | x    |     |     | x   |     |     |     |             | D5   |      |     |     |     |     | x   | x   |
| D6    | x    |      |     |     |     |     |     |     | D6         |      |      |     |     |     |     |     |     |             | D6   |      |     |     |     |     |     |     |
| D7    |      |      |     |     |     |     |     |     | D7         |      |      |     |     |     |     |     |     |             | D7   |      |     |     |     |     |     |     |
| D8    |      |      |     |     |     |     |     |     | D8         |      | x    |     |     |     |     |     |     |             | D8   |      |     |     |     |     |     |     |
| D9    |      |      |     |     |     |     |     |     | D9         |      |      |     |     |     |     |     |     |             | D9   | x    |     |     |     |     |     | x   |
| D10   |      | x    |     |     |     |     |     |     | D10        |      |      |     |     |     |     |     | x   | x           | D10  |      |     |     |     | x   |     | x   |
| D11   |      |      |     |     |     |     |     |     | D11        |      |      |     |     |     | x   | x   | x   |             | D11  |      |     |     |     |     | x   |     |
| D12   | x    |      |     |     |     |     |     |     | D12        |      | x    |     |     |     | x   |     |     |             | D12  |      |     |     |     |     |     |     |

| JCSG+      |      |      |     |     |     |                  |     |      | MORPHEUS I |      |      |     |     |     |                  |     |      | MORPHEUS II |      |      |     |     |     |                  |     |      |
|------------|------|------|-----|-----|-----|------------------|-----|------|------------|------|------|-----|-----|-----|------------------|-----|------|-------------|------|------|-----|-----|-----|------------------|-----|------|
| Well       | Con. | Pol. | E2H | Bar | CCD | UPL              | NEF | HIV  | Well       | Con. | Pol. | E2H | Bar | CCD | UPL              | NEF | HIV  | Well        | Con. | Pol. | E2H | Bar | CCD | UPL              | NEF | HIV  |
| E1         |      |      |     |     |     |                  |     |      | E1         | x    | x    |     |     |     |                  |     |      | E1          |      | x    |     |     |     |                  |     |      |
| E2         |      |      |     |     |     |                  | x   |      | E2         | x    |      |     |     |     |                  |     | x    | E2          |      | x    |     |     |     |                  |     |      |
| E3         |      |      |     |     |     |                  |     |      | E3         | x    |      |     |     |     |                  |     | x    | E3          |      | x    |     |     |     |                  |     |      |
| E4         |      |      |     |     | x   |                  | x   |      | E4         | x    | x    |     |     |     |                  |     |      | E4          |      |      |     |     |     |                  |     |      |
| E5         |      |      |     |     |     |                  |     |      | E5         |      | x    |     |     |     |                  |     |      | E5          | x    |      |     |     | x   |                  |     | x    |
| E6         | x    |      |     |     |     |                  |     |      | E6         |      |      |     |     |     |                  |     |      | E6          |      |      |     |     |     |                  |     |      |
| E7         |      |      |     |     |     |                  |     |      | E7         |      |      |     |     |     |                  |     | x    | E7          |      |      |     |     |     |                  |     |      |
| E8         |      |      |     |     |     |                  |     |      | E8         |      | x    |     |     |     |                  |     |      | E8          |      |      |     |     |     |                  |     |      |
| E9         |      |      |     |     |     |                  | x   |      | E9         |      | x    |     |     |     |                  |     |      | E9          | x    |      |     |     | x   | x                |     | x    |
| E10        |      |      |     |     |     |                  |     |      | E10        |      |      |     |     |     |                  |     | x    | E10         |      |      |     |     | x   |                  |     | x    |
| E11        |      |      |     | x   |     |                  |     |      | E11        |      |      |     |     |     | x                |     | x    | E11         |      |      |     |     | x   |                  | x   |      |
| E12        |      |      |     |     |     |                  |     | x    | E12        |      | x    |     |     | x   |                  |     |      | E12         |      |      |     |     |     |                  |     |      |
| F1         |      |      |     |     |     |                  |     |      | F1         |      | x    |     |     |     |                  |     |      | F1          | x    |      |     |     |     |                  |     |      |
| F2         |      |      |     |     |     |                  |     |      | F2         |      |      |     |     |     |                  |     |      | F2          |      |      |     |     |     |                  |     | x    |
| F3         |      |      |     |     |     |                  |     |      | F3         |      |      |     |     |     |                  |     |      | F3          |      |      |     |     | x   |                  |     |      |
| F4         |      |      |     |     |     |                  |     |      | F4         |      | x    |     |     |     |                  |     |      | F4          |      |      |     |     | x   |                  |     |      |
| F5         |      |      |     |     |     |                  |     |      | F5         |      | x    |     |     |     |                  |     |      | F5          | x    |      |     |     |     |                  |     | x    |
| F6         |      |      |     |     |     |                  |     |      | F6         |      |      |     |     |     |                  |     | x    | F6          |      |      |     |     |     |                  |     |      |
| F7         |      |      |     |     |     |                  | x   |      | F7         |      |      |     |     |     |                  |     |      | F7          |      |      |     |     |     |                  |     | x    |
| F8         |      |      |     |     |     |                  |     |      | F8         |      | x    |     |     |     |                  |     |      | F8          |      |      |     |     |     |                  |     |      |
| F9         |      |      |     |     |     |                  |     |      | F9         |      |      |     |     |     |                  |     |      | F9          | x    |      |     |     | x   | x                |     | x    |
| F10        |      |      |     |     |     |                  |     |      | F10        |      |      |     |     |     |                  |     | x    | F10         |      |      |     |     | x   |                  |     | x    |
| F11        |      |      |     |     |     |                  |     |      | F11        |      |      |     |     |     | x                |     | x    | F11         |      |      |     |     |     |                  | x   |      |
| F12        |      |      |     |     |     |                  |     |      | F12        |      | x    |     |     | x   |                  |     |      | F12         |      |      |     |     |     |                  |     |      |
| G1         |      |      |     |     |     |                  |     |      | G1         | x    | x    |     |     |     |                  |     |      | G1          | x    |      |     |     |     |                  |     | x    |
| G2         |      |      |     |     | x   |                  | x   |      | G2         |      |      |     |     |     |                  |     |      | G2          | x    |      |     |     |     |                  |     | x    |
| G3         |      |      |     |     |     |                  |     |      | G3         |      |      |     |     |     |                  |     |      | G3          | x    |      |     |     |     |                  | x   | x    |
| G4         |      |      |     |     |     |                  |     | x    | G4         | x    | x    |     |     |     |                  |     |      | G4          |      |      |     | x   |     |                  |     |      |
| G5         | x    |      |     |     |     |                  |     |      | G5         |      | x    |     |     |     |                  |     |      | G5          | x    |      |     |     |     |                  |     |      |
| G6         | x    |      |     |     |     |                  | x   |      | G6         |      |      |     |     |     |                  |     |      | G6          |      |      |     |     | x   |                  |     |      |
| G7         | x    |      |     |     |     |                  |     | x    | G7         |      |      |     |     |     |                  |     |      | G7          |      |      |     | x   |     |                  | x   | x    |
| G8         | x    |      |     |     | x   |                  | x   |      | G8         |      | x    |     | x   |     |                  |     |      | G8          |      |      |     |     |     |                  | x   | x    |
| G9         |      |      |     |     |     |                  |     | x    | G9         |      | x    |     |     |     |                  |     |      | G9          |      |      |     |     |     |                  | x   | x    |
| G10        |      | x    |     |     |     |                  |     | x    | G10        |      |      |     |     |     |                  |     | x    | G10         |      |      |     |     | x   |                  |     | x    |
| G11        |      | x    |     |     |     |                  |     |      | G11        |      |      |     |     |     | x                |     | x    | G11         |      |      |     |     | x   |                  | x   | x    |
| G12        |      |      |     |     |     |                  |     |      | G12        |      | x    |     | x   |     |                  |     |      | G12         |      |      |     |     |     |                  |     |      |
| H1         |      |      |     |     |     |                  |     |      | H1         | x    | x    |     |     |     |                  |     |      | H1          |      | x    |     |     |     |                  |     |      |
| H2         |      |      |     |     |     |                  |     |      | H2         | x    |      |     |     |     |                  |     |      | H2          |      |      |     |     |     |                  |     |      |
| H3         |      | x    |     |     |     |                  |     |      | H3         |      |      |     |     |     |                  |     |      | H3          |      |      |     |     |     |                  | x   |      |
| H4         |      |      |     |     |     |                  |     |      | H4         | x    | x    |     |     |     |                  |     |      | H4          |      |      |     | x   |     |                  |     |      |
| H5         | x    |      |     |     |     |                  |     |      | H5         | x    | x    |     |     |     |                  | x   |      | H5          |      |      |     | x   |     | x                |     |      |
| H6         | x    |      |     | x   |     |                  |     | x    | H6         |      |      |     |     |     |                  |     |      | H6          |      |      |     | x   |     |                  |     | x    |
| H7         |      | x    |     |     |     |                  |     |      | H7         |      |      |     |     |     |                  |     |      | H7          |      |      |     |     |     |                  |     | x    |
| H8         |      | x    |     |     |     |                  |     | x    | H8         |      | x    |     |     |     |                  |     |      | H8          |      |      |     |     |     |                  |     |      |
| H9         |      | x    |     |     |     |                  |     |      | H9         |      | x    |     |     |     |                  |     |      | H9          |      |      |     | x   |     |                  |     |      |
| H10        | x    | x    |     |     |     |                  |     | x    | H10        |      |      |     |     | x   |                  |     |      | H10         |      |      |     |     |     |                  |     | x    |
| H11        | x    | x    |     |     |     |                  |     |      | H11        |      |      |     |     | x   | x                |     |      | H11         |      |      |     |     | x   |                  |     |      |
| H12        | x    |      |     |     |     |                  |     |      | H12        |      | x    |     |     | x   |                  |     |      | H12         |      |      |     |     |     |                  |     |      |
| <b>Sum</b> | 23   | 14   | 1   | 8   | 10  | 7                | 7   | 17   |            | 18   | 45   | 0   | 5   | 15  | 9                | 6   | 34   |             | 32   | 4    | 2   | 2   | 28  | 9                | 13  | 37   |
|            |      |      |     |     |     | <b>Total</b>     |     | 87   |            |      |      |     |     |     | <b>Total</b>     |     | 132  |             |      |      |     |     |     | <b>Total</b>     |     | 127  |
|            |      |      |     |     |     | <b>Yield (%)</b> |     | 11.3 |            |      |      |     |     |     | <b>Yield (%)</b> |     | 17.2 |             |      |      |     |     |     | <b>Yield (%)</b> |     | 16.5 |
